# Supplementary material for: An aliphatic MOF with a molecular sieving effect for efficient C2H2/C2H4 separation
Source: Royal Society of Chemistry journal article supplement (doi:10.1039/d3dt01419c), 2023-01-01
Supplement: d3dt01419c1.pdf [file d3dt01419c1.pdf]

## Electronic Supplementary Information (ESI)

### **An aliphatic MOF with molecular sieving effect for efficient C<sub>2</sub>H<sub>2</sub>/C<sub>2</sub>H<sub>4</sub> separation**

Xianzhen Li,<sup>a</sup> Chen Cao<sup>a</sup>, Ziwen Fan<sup>a</sup>, Jianfa Liu<sup>a</sup>, Tony Pham<sup>b</sup>, Katherine A. Forrest

<sup>b</sup> and Zheng Niu<sup>\*a</sup>

<sup>a</sup> College of Chemistry, Chemical Engineering and Materials Science, Soochow University, Suzhou 215123, China.

<sup>b</sup> Department of Chemistry, University of South Florida, 4202 East Fowler Avenue, CHE 205A, Tampa, Florida 33620–5250, United States.

\* Corresponding author.

E-mail: [zhengniu@suda.edu.cn](mailto:zhengniu@suda.edu.cn).

## Table of Contents

|                                                                                       |     |
|---------------------------------------------------------------------------------------|-----|
| 1. General information .....                                                          | S3  |
| 1.2 Preparation of Cu(bodc)(bpy) <sub>0.5</sub> ·2H <sub>2</sub> O (SDMOF-1).....     | S3  |
| 1.3 Preparation of actived SDMOF-1 .....                                              | S3  |
| 1.4 Preparation of SDMOF-1@C <sub>2</sub> H <sub>2</sub> .....                        | S3  |
| 2. Single-crystal X-ray diffraction crystallography .....                             | S3  |
| 3. Low-pressure gas adsorption measurement.....                                       | S4  |
| 4. Ideal Adsorbed Solution Theory .....                                               | S4  |
| 5. The separation potential ( $\Delta Q$ ) .....                                      | S6  |
| 6. Theory Isotheric Heat of Adsorption.....                                           | S7  |
| 7. Periodic Density Functional Theory .....                                           | S7  |
| 8. Breakthrough test .....                                                            | S8  |
| Figure S1 Column breakthrough experiment.....                                         | S8  |
| Figure S2 Cavity geometry and dimensions of as-synthesized SDMOF-1. ....              | S9  |
| Figure S3 Pore size distribution (PSD) of SDMOF-1.....                                | S9  |
| Figure S4 TGA curve of SDMOF-1.. ....                                                 | S10 |
| Figure S5 PXRD patterns of SDMOF-1.. ....                                             | S10 |
| Figure S6 PXRD patterns of SDMOF-1 after breakthrough and adsorption test. ....       | S11 |
| Figure S7 N <sub>2</sub> adsorption isotherm for SDMOF-1 .....                        | S11 |
| Figure S8 CO <sub>2</sub> adsorption isotherm for SDMOF-1 at 195 K.....               | S12 |
| Figure S9 BET calculation .....                                                       | S12 |
| Figure S10 C <sub>2</sub> H <sub>2</sub> adsorption isotherm of SDMOF-1 at 273 K..... | S13 |
| Figure S11 C <sub>2</sub> H <sub>2</sub> adsorption isotherm of SDMOF-1 at 298 K..... | S13 |
| Figure S12 C <sub>2</sub> H <sub>2</sub> adsorption isotherm of SDMOF-1 at 303 K..... | S14 |
| Figure S13 C <sub>2</sub> H <sub>4</sub> adsorption isotherm of SDMOF-1 at 273 K..... | S14 |
| Figure S14 C <sub>2</sub> H <sub>4</sub> adsorption isotherm of SDMOF-1 at 298 K..... | S15 |
| Figure S15 C <sub>2</sub> H <sub>4</sub> adsorption isotherm of SDMOF-1 at 303 K..... | S15 |
| Figure S16 SEM of SDMOF-1 crystal. ....                                               | S16 |

|                        |                                                                                                                       |            |
|------------------------|-----------------------------------------------------------------------------------------------------------------------|------------|
| <b>Table S1</b>        | <b>Crystal data and structure refinement parameters for SDMOF-1.....</b>                                              | <b>S17</b> |
| <b>Table S2</b>        | <b>Crystal data and structure refinement parameters for SDMOF-1@C<sub>2</sub>H<sub>2</sub>. .....</b>                 | <b>S18</b> |
| <b>Table S3</b>        | <b>The DSLF fitted parameters of C<sub>2</sub>H<sub>2</sub> isotherms at 273 K and 298 K. ....</b>                    | <b>S19</b> |
| <b>Table S4</b>        | <b>The DSLF fitted parameters of C<sub>2</sub>H<sub>4</sub> isotherms at 273 K and 298 K. ....</b>                    | <b>S20</b> |
| <b>Table S5</b>        | <b>The adsorption performance of C<sub>2</sub>H<sub>2</sub> and C<sub>2</sub>H<sub>4</sub> for various MOFs. ....</b> | <b>S20</b> |
| <b>Table S6</b>        | <b>The breakthrough time of five cycles.....</b>                                                                      | <b>S21</b> |
| <b>References.....</b> |                                                                                                                       | <b>S21</b> |

## 1. General information

All other chemicals and reagents were commercially available and used without further purification. The IR spectra were recorded on a Varian 1000 FT-IR spectrometer as KBr disks in the range of 4000-400  $\text{cm}^{-1}$ . The powder X-ray diffraction (PXRD) patterns were collected on a PANalytical Aeris diffractometer with Cu-K $\alpha$  radiation ( $\lambda = 1.5406 \text{ \AA}$ ) over the  $2\theta$  range of 3-50° at room temperature. The thermogravimetric analyses (TGA) were performed on a Mettler TGA/SDTA851 thermal analyzer under an N<sub>2</sub> atmosphere with a heating rate of 5 °C min<sup>-1</sup>. The low-pressure gas sorption isotherms were collected on an ASAP 2020 Surface Area and Porosity Analyzer (Micromeritics) which equipped with a turbo molecular vacuum pump. The breakthrough experiment was monitored by gas chromatography analyzer (990 Micro GC, Agilent), and the test gas was a mixture of acetylene and ethylene.

### 1.2 Preparation of Cu(bodc)(bpy)<sub>0.5</sub>·2H<sub>2</sub>O (SDMOF-1)

A mixture of bicyclo [2.2.2] octane-1,4-dicarboxylic acid (H<sub>2</sub>bodc; 0.022 mmol, 4.36 mg) and bipyridine (bpy; 0.012 mmol, 1.87 mg) was dissolved in DMF (0.6 mL) and sonicated for 10 minutes. Cu (NO<sub>3</sub>)<sub>2</sub>·3H<sub>2</sub>O was dissolved in H<sub>2</sub>O (1.2 mL) then added dropwise. After sonication for 30 minutes, hydrothermal tubes with the mixture were placed in the oven for programmed heat-up, which started at a rate of 12 °C/min, maintained at 100 °C for 48 h, and then cooled down at a rate of 6 °C/min. Finally, green crystals were obtained with a yield of 64 %. Anal. calcd. (%) for C<sub>15</sub>H<sub>16</sub>CuNO<sub>4</sub>: C, 53.32, H, 4.77, N, 4.15; found: C, 51.37, H, 4.67, N, 4.05. IR (KBr disk,  $\text{cm}^{-1}$ ): 2957 (s), 2872 (s), 1608 (s), 1458 (m), 1405 (s), 1218(m), 1109 (m), 1039 (w), 864 (m), 809 (m), 755 (m), 634 (m).

### 1.3 Preparation of actived SDMOF-1

The crystals of Cu(bodc)(bpy)<sub>0.5</sub>·2H<sub>2</sub>O were soaked in anhydrous methanol for 3 days with fresh methanol 6 times. Then, the crystals were vacuumed at room temperature till the pressure below to 5  $\mu\text{mHg}$ , the temperature was increased to 140 °C and vacuum for 12 h. Consequently, the green crystal of anhydrous SDMOF-1 was obtained.

### 1.4 Preparation of SDMOF-1@C<sub>2</sub>H<sub>2</sub>

The selected activated SDMOF-1 was filled into a glass tube and collect with ASAP 2020, and the sample was vacuumed at 140 °C for 12 h. After the sample cooling down, the C<sub>2</sub>H<sub>2</sub> gas was induced into the sample until the pressure reach to 1 bar at 298 K. The crystals were picked out and covered with the degassed oil in the glove box after 3 h for single crystal X-ray diffraction measurements.

## 2. Single-crystal X-ray diffraction crystallography

Single crystal with appropriate dimensions was chosen under an optical microscope and quickly coated with high vacuum grease to prevent decomposition. Crystallographic data of SDMOF-1 and C<sub>2</sub>H<sub>2</sub> loaded SDMOF-1 were collected with a Bruker D8-Quest diffractometer with a graphite monochromated Ga K $\alpha$  radiation ( $\lambda = 1.34138\text{\AA}$ ). The cell parameters refinement and data reduction were performed using the program Bruker Apex III with absorption correction (multi-scan) applied<sup>1</sup>. All the structures were solved by direct methods and refined anisotropically by full-matrix least-squares techniques based on  $F^2$  using the SHELXS-97 and SHELXL-97 programs<sup>2</sup> contained on Olex 2<sup>3</sup>. Anisotropic thermal parameters were assigned to all non-hydrogen atoms. The hydrogen atoms of the ligand were generated geometrically; the hydrogen atoms of the C<sub>2</sub>H<sub>2</sub> molecules were in Fourier-difference electron density maps and refined with isotropic temperature factors. The large solvent accessible void in the lattice is caused by the vacuum process before single crystal diffraction measurement. Pertinent crystallographic data collection and refinement parameters are collated in **Table S1** and **S2**. Crystallographic data have been deposited in the Cambridge Crystallographic Data Center (CCDC) with the reference numbers of 2260960 for **SDMOF-1**, and 2260961 for **SDMOF-1@C<sub>2</sub>H<sub>2</sub>**.

### 3. Low-pressure gas adsorption measurement.

Crystalline samples (50-60 mg) of activated SDMOF-1 were transferred to a pre-weighed 6-mm large bulb glass sample cell. The low-pressure gas sorption isotherms were collected on an ASAP 2020 Surface Area and Porosity Analyzer (Micromeritics) which equipped with a turbo molecular vacuum pump. The apparent surface areas of activated SDMOF-1 were determined from the nitrogen adsorption isotherm collected at 77 K and carbon dioxide adsorption isotherm collected at 195 K by applying the Brunauer-Emmett-Teller (BET) and Langmuir models.

### 4. Ideal Adsorbed Solution Theory

The C<sub>2</sub>H<sub>2</sub>/C<sub>2</sub>H<sub>4</sub> selectivities for the adsorbate mixture compositions of interest (1:99) in SDMOF-1 at 298 K were calculated using ideal adsorbed solution theory (IAST)<sup>4</sup>. The single-component isotherms for C<sub>2</sub>H<sub>2</sub> and C<sub>2</sub>H<sub>4</sub> at 298 K were fitted to the dual-site Langmuir-Freundlich equation (DSLFF) equation<sup>5</sup>:

$$n(P) = \frac{nm_1 b_1 P^{\left(\frac{1}{t_1}\right)}}{1 + b_1 P^{\left(\frac{1}{t_1}\right)}} + \frac{nm_2 b_2 P^{\left(\frac{1}{t_2}\right)}}{1 + b_1 P^{\left(\frac{1}{t_2}\right)}} \quad (1)$$

In this equation,  $n$  is the amount adsorbed per mass of material (in mmol g<sup>-1</sup>),  $P$  is the total pressure (in kPa) of the bulk gas at equilibrium with the adsorbed phase,  $n_{m1}$

and  $n_{m2}$  are the saturation uptakes (in mmol g<sup>-1</sup>) for sites 1 and 2,  $b_1$  and  $b_2$  are the affinity coefficients (in kPa<sup>-1</sup>) for sites 1 and 2, and  $t_1$  and  $t_2$  represent the deviations from the ideal homogeneous surface (unitless) for sites 1 and 2. The parameters that were obtained from the fitting are found in **Tables S3 and S4**. Both isotherms were fitted with  $R^2 > 0.9999$ . Next, the spreading pressure for adsorbates  $i$  and  $j$  can be calculated using the following equations:

$$\frac{\pi_i^0 A}{RT} = \int_0^{P_i^0(\pi)} \frac{n_i(P)}{P} dP \quad (2)$$

$$\frac{\pi_j^0 A}{RT} = \int_0^{P_j^0(\pi)} \frac{n_j(P)}{P} dP \quad (3)$$

In the above equations,  $A$  represents the specific surface area (assumed to be the same for all adsorbates),  $R$  is the ideal gas constant,  $T$  is the temperature, and  $P_i^0(\pi)$  and  $P_j^0(\pi)$  are the equilibrium gas phase pressures corresponding to the solution temperature and solution spreading pressure for the sorption of pure components  $i$  and  $j$ , respectively. Further, the following equations hold true for a two-component mixture according to IAST:

$$\pi_i^0 = \pi_j^0 \quad (4)$$

$$Py_i = P_i^0 x_i \quad (5)$$

$$Py_j = P_j^0 x_j \quad (6)$$

$$x_i + x_j = 1 \quad (7)$$

$$y_i + y_j = 1 \quad (8)$$

Here,  $x_i$  and  $x_j$  are the mole fractions of components  $i$  and  $j$ , respectively, in the adsorbed phase, and  $y_i$  and  $y_j$  are the mole fractions of components  $i$  and  $j$ , respectively, in the gas phase. The previous seven equations are seven independent equations with nine unknowns. In order to solve for all of the unknowns, two quantities must be specified, particularly  $P$  and  $y_i$ . Utilization of the equations yield the following equilibrium expression for adsorbates  $i$  and  $j$ :

$$\int_0^{Py_i} \frac{x_i n_i(P)}{P} dP = \int_0^{P(1-y_i)} \frac{(1-x_i) n_j(P)}{P} dP \quad (9)$$

The above equation was solved for  $x_i$  using numerical analysis for a range of pressures at a specified  $y_i$  value. Finally, the selectivity for adsorbate  $i$  relative to adsorbate  $j$  was calculated using the following:

$$S_{i/j} = \frac{x_i y_j}{x_j y_i} \quad (10)$$

The total amount of gas adsorbed within the mixture can be calculated using the following equation:

$$n_{tot} = \frac{n_i^0(P_i^0) n_j^0(P_j^0)}{x_i n_j^0(P_j^0) + x_j n_i^0(P_i^0)} \quad (11)$$

Where  $n_i^0(P_i^0)$  and  $n_j^0(P_j^0)$  are the amount adsorbed in the standard state at the equilibrium gas phase pressure for sorbates  $i$  and  $j$ , respectively. The actual amount adsorbed for each component within the mixture can be calculated using the following:

$$n_i = n_{tot} x_i \quad (12)$$

$$n_j = n_{tot} x_j \quad (13)$$

## 5. The separation potential ( $\Delta Q$ )

For separation of a binary mixture of components A and B, the adsorption selectivity,  $S_{A/B}$ , is defined by:

$$S_{A/B} = \frac{q_A/q_B}{y_A/y_B} \quad (14)$$

Where  $q_A$ ,  $q_B$  are the molar loadings (units: mol kg<sup>-1</sup>) in the adsorbed phase in equilibrium with a bulk gas phase mixture with mole fractions  $y_A$ , and  $y_B = 1 - y_A$ . The volumetric uptake capacities are:

$$Q_A = \rho q_A \quad (15)$$

$$Q_B = \rho q_B \quad (16)$$

Where  $\rho$  is the crystal framework density of the MOF, expressed say in units of  $\text{kg m}^{-3}$ , or  $\text{kg L}^{-1}$ . The uptake capacities can be calculated using pure components isotherm fits, along with the mixed-gas Langmuir model or the Ideal Adsorbed Solution Theory (IAST) of Myers and Prausnitz for adsorption equilibrium.

Using the shock wave model for fixed bed adsorbers, Krishna<sup>6, 7</sup> has suggested that the appropriate metric is the separation potential,  $\Delta Q$ . The appropriate expression describing the productivity of pure  $\text{C}_2\text{H}_4$  in the desorption phase of fixed-bed operations is:

$$\Delta Q = Q_A \frac{y_B}{1 - y_B} - Q_B \quad (17)$$

The mole fraction  $y_B$  refers to composition of the feed mixture.

## 6. Theory Isosteric Heat of Adsorption

The experimental isosteric heat of adsorption ( $Q_{st}$ ) values for  $\text{C}_2\text{H}_2$  and  $\text{C}_2\text{H}_4$  in SDMOF-1 were determined by first fitting the adsorption isotherms at 273 and 298 K for the respective adsorbates to the DSLF equation (see Ideal Adsorbed Solution Theory section above) and subsequently applying the Clausius-Clapeyron method<sup>8</sup>. The parameters that were obtained from the fitting of the  $\text{C}_2\text{H}_2$  and  $\text{C}_2\text{H}_4$  adsorption isotherms are found in **Tables S3 and S4**. All isotherms were fitted with  $R^2 > 0.999$ .

The fitted parameters were used to calculate the  $Q_{st}$  values for a range of uptakes through the Clausius-Clapeyron equation, which is the following:

$$Q_{st} = -R \frac{\partial \ln P}{\partial \left(\frac{1}{T}\right)} \quad (14)$$

where  $T$  is the temperature (in K) and  $R$  is the ideal gas constant. The partial derivative term actually represents the slope of the plot of  $\ln P$  vs.  $1/T$  for a number of isotherms at different temperatures at various loadings. Therefore, the above  $Q_{st}$  equation can be simplified to:

$$Q_{st} = -mR \quad (15)$$

where  $m$  is the slope, which can be calculated by the following for two different temperatures and their corresponding pressures:



$$m = \frac{T_1 T_2}{T_1 - T_2} \ln \left( \frac{P_2}{P_1} \right) \quad (16)$$

where  $P_2 > P_1$  and  $T_2 > T_1$ . The  $P_i$  values were back-calculated for a range of uptakes using the DSLF equation *via* an iterative technique (e.g., the Newton-Raphson method)<sup>9</sup>.

## 7. Periodic Density Functional Theory

The binding energy for C<sub>2</sub>H<sub>2</sub> in SDMOF-1 was determined using the experimental single X-ray crystal structure in which all C<sub>2</sub>H<sub>2</sub> molecules were resolved at the primary binding sites in the material. Periodic density functional theory (DFT) calculations were performed with only one C<sub>2</sub>H<sub>2</sub> molecule localized at the primary binding site within a single unit cell of the MOF. A full structural relaxation was performed on this system in which the atomic positions were permitted to fluctuate, but with the basis vectors held constant. After the relaxation, counterpoise-corrected energies of the MOF and adsorbate components were individually determined and subtracted from the total system energy to yield a binding energy of -55.46 kJ mol<sup>-1</sup>. These calculations were implemented with the CP2K simulation package<sup>10</sup> using MOLOPT basis sets at the triple  $\zeta$  level of theory<sup>11, 12</sup>, Perdew–Burke–Ernzerhof (PBE) pseudopotentials<sup>13, 14</sup>, and DFT-D pairwise dispersion corrections<sup>15</sup>.

## 8. Breakthrough test

Dynamic breakthrough experiments were carried out in the dynamic gas breakthrough equipment with gas mixing system and online gas chromatography system. The activated sample was packed in a stainless-steel column (4.6 mm inner diameter  $\times$  50 mm). The weight of sample SDMOF-1 powder packed in the column was 0.52 g. The column packed with the sample was firstly activated with He flow (12 mL min<sup>-1</sup>) for 1 h at room temperature (298 K). After preparation, the mixed gas (C<sub>2</sub>H<sub>2</sub>/C<sub>2</sub>H<sub>4</sub>: 1/99, v/v) flow was introduced around 7 mL min<sup>-1</sup> into these columns. Outlet gas from the column was monitored using gas chromatography (990 Micro GC, Agilent). The experimental set-up of the column breakthrough experiment is presented in **Figure S1**.

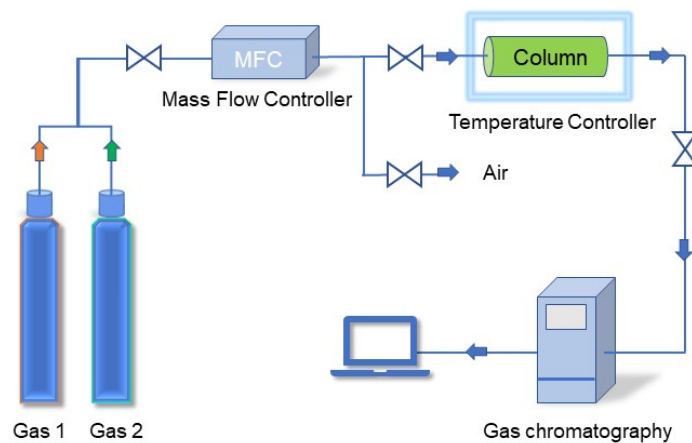

**Figure S1** Schematic representation of the column breakthrough experiment set-up combined with the mass spectrophotometer.

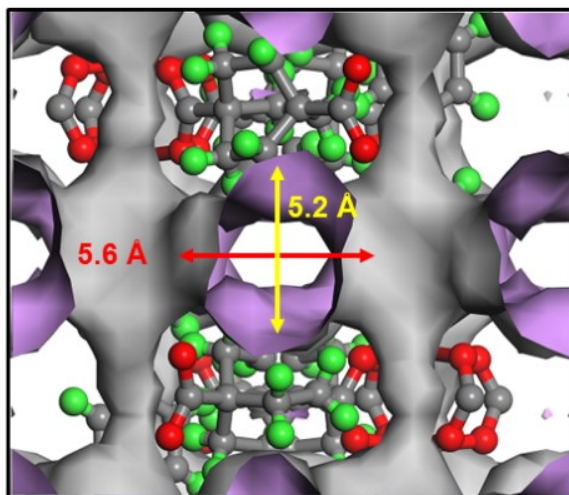

**Figure S2** Cavity geometry and dimensions of as-synthesized SDMOF-1.

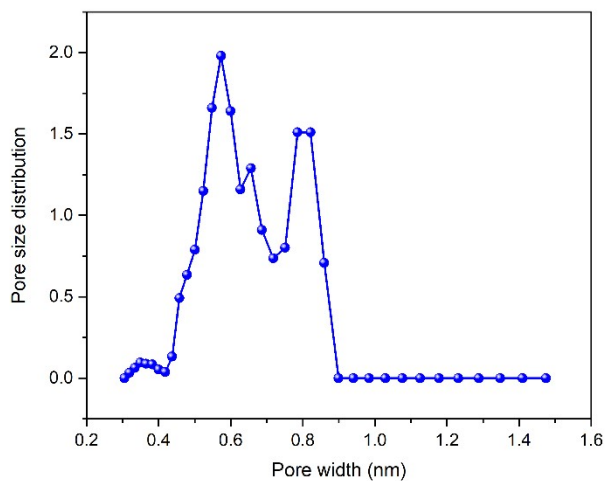

**Figure S3** Pore size distribution (PSD) of SDMOF-1.

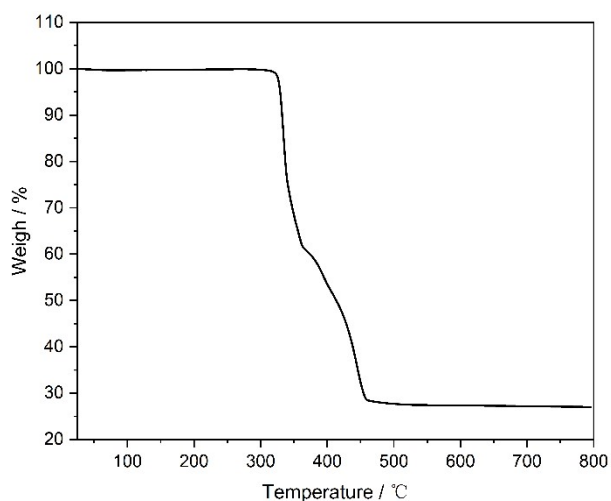

**Figure S4** TGA curve of SDMOF-1. The samples were pretreated before thermogravimetric analysis and the water molecules contained in the structure were removed through heating. From 325 to 650 °C, SDMOF-1 gradually decomposed to CuO (observed value of weight loss: 27.1%, calculated value: 23.7%).

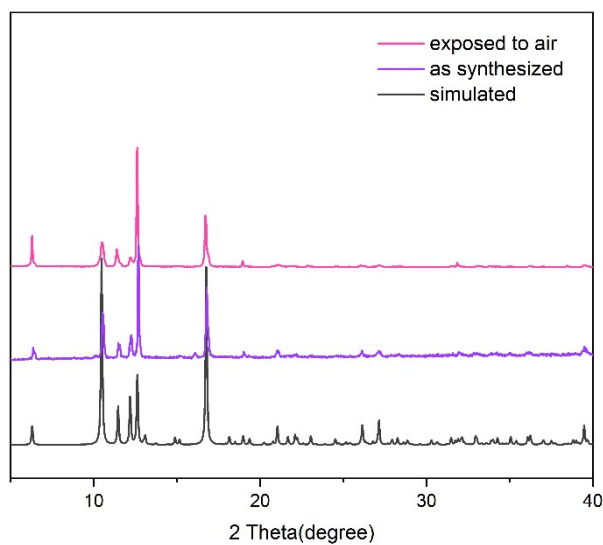

**Figure S5** PXRd patterns of SDMOF-1. The pink line presented the PXRd pattern of SDMOF-1 exposed to the air for six months and the purple line presented the PXRd pattern of synthesized SDMOF-1.

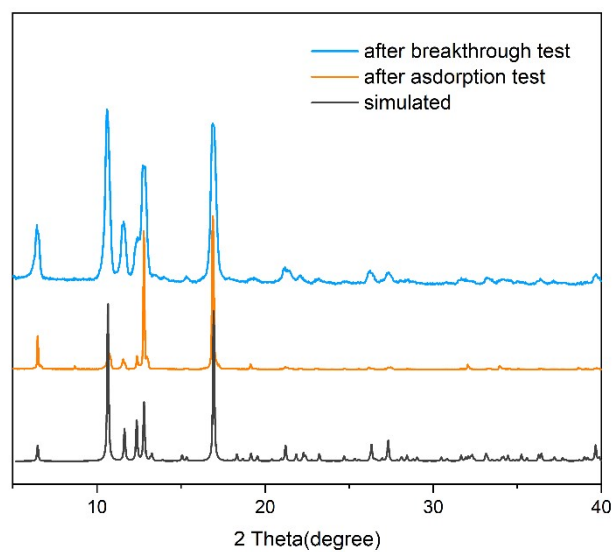

**Figure S6** PXRd patterns of SDMOF-1 after breakthrough test (blue line) and adsorption test (orange line).

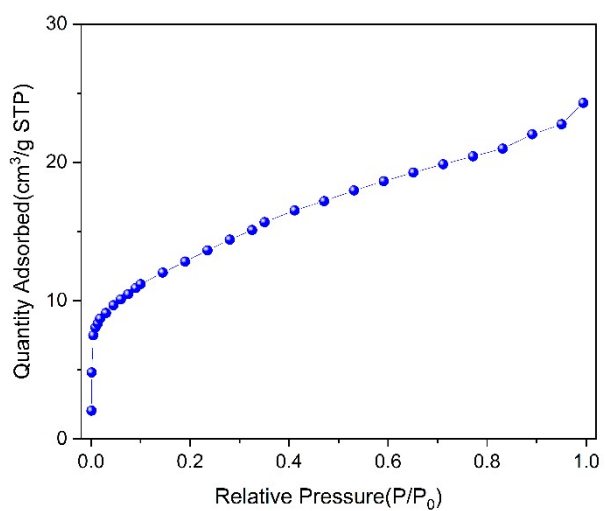

**Figure S7**  $\text{N}_2$  adsorption isotherm for SDMOF-1 at 77 K.

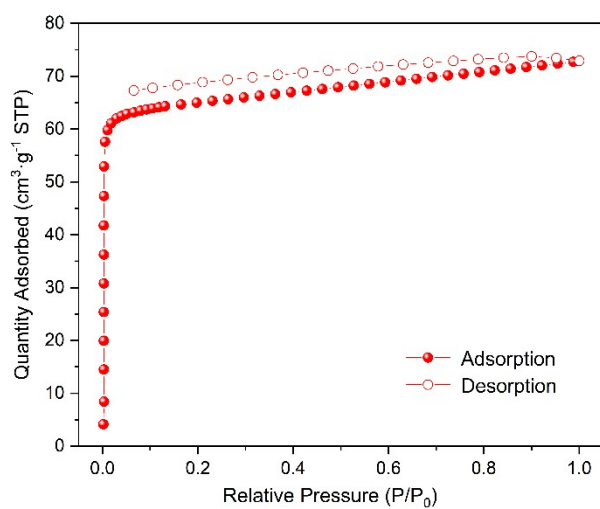

**Figure S8**  $\text{CO}_2$  adsorption isotherm for SDMOF-1 at 195 K.

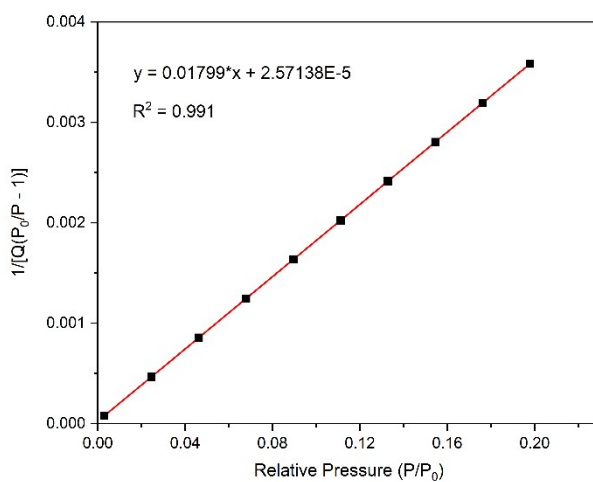

**Figure S9** BET calculation based on CO<sub>2</sub> adsorption isotherm of SDMOF-1 at 195 K. (Standard Deviation:  $2.57138 \pm 2.92066E-5$ ;  $0.01799 \pm 3.82803E-4$ ).

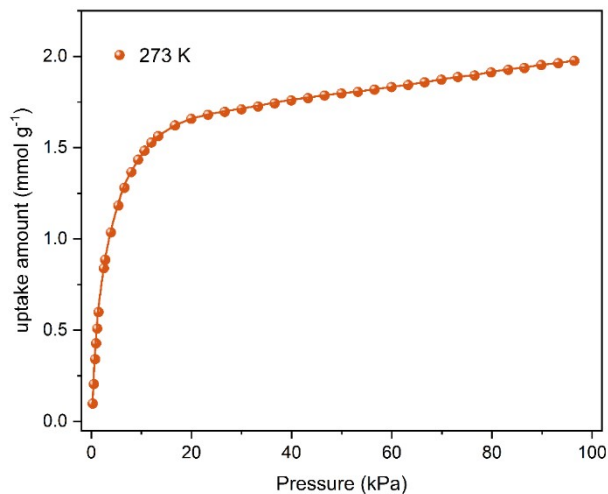

**Figure S10** C<sub>2</sub>H<sub>2</sub> adsorption isotherm of SDMOF-1 at 273 K (circles stand for experiment data; lines are from DSFL fitting).

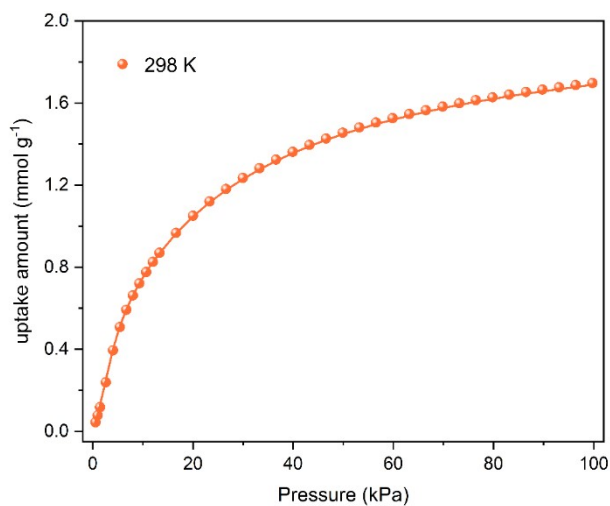

**Figure S11** C<sub>2</sub>H<sub>2</sub> adsorption isotherm of SDMOF-1 at 298 K (circles stand for experiment data; lines are from DSFL fitting).

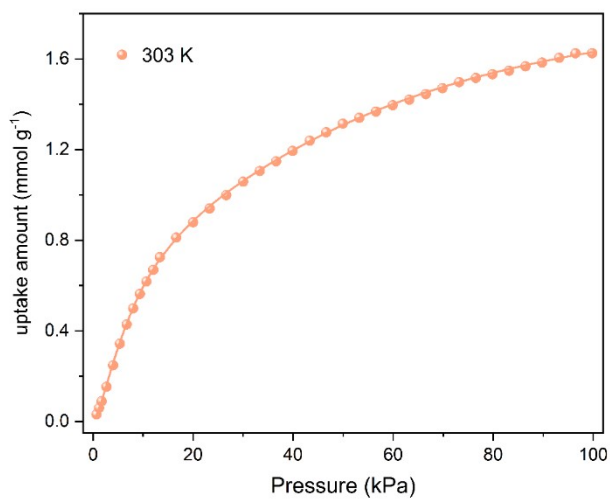

**Figure S12** C<sub>2</sub>H<sub>2</sub> adsorption isotherm of SDMOF-1 at 303 K (circles stand for experiment data; lines are from DSFL fitting).

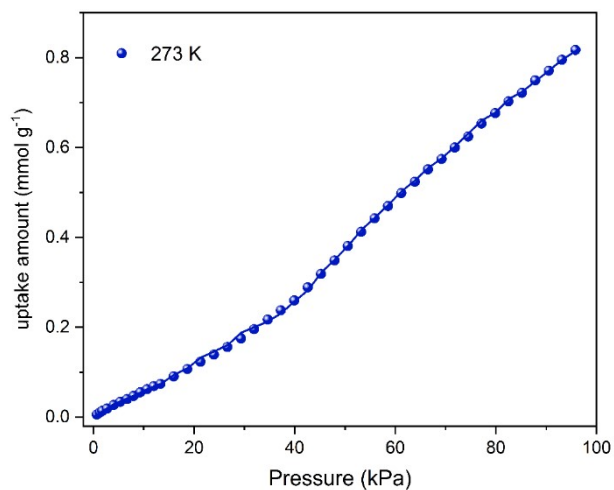

**Figure S13**  $C_2H_4$  adsorption isotherm of SDMOF-1 at 273 K (circles stand for experiment data; lines are from DSFL fitting).

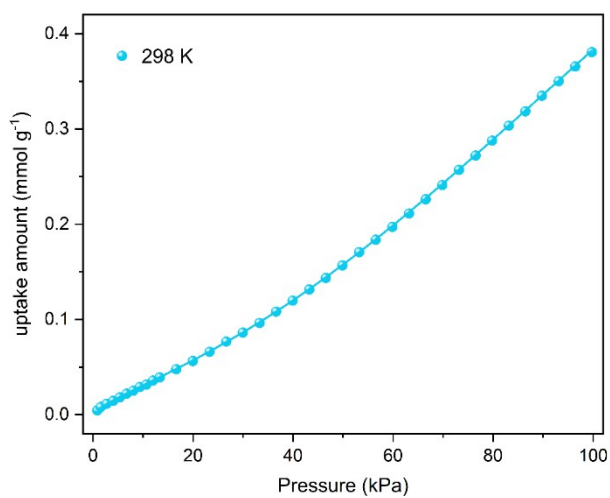

**Figure S14**  $C_2H_4$  adsorption isotherm of SDMOF-1 at 298 K (circles stand for experiment data; lines are from DSFL fitting).



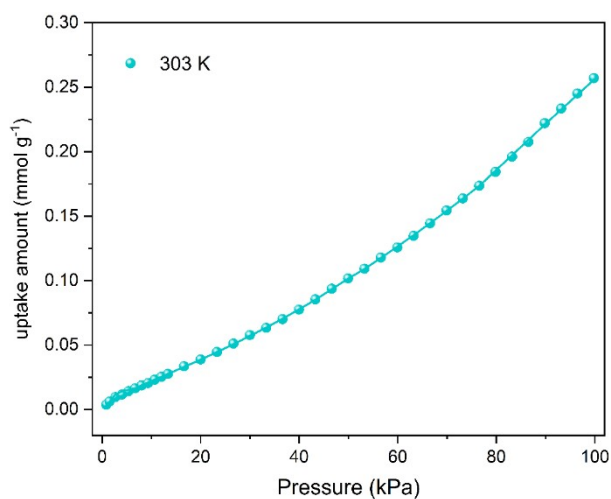

**Figure S15**  $C_2H_4$  adsorption isotherm of SDMOF-1 at 303 K (circles stand for experiment data; lines are from DSFL fitting).

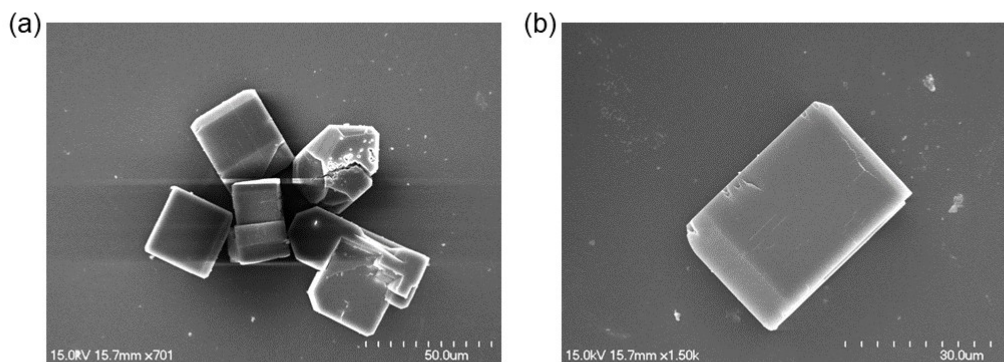

**Figure S16** Scanning electron microscope (SEM) images of SDMOF-1 crystal.

**Table S1** Crystal data and structure refinement parameters for SDMOF-1.

---

**SDMOF-1**

---

|                                            |                                                                   |
|--------------------------------------------|-------------------------------------------------------------------|
| Empirical formula                          | C <sub>15</sub> H <sub>20</sub> CuNO <sub>6</sub>                 |
| CCDC number                                | 2260960                                                           |
| Formula weight                             | 373.86                                                            |
| Temperature [K]                            | 120.00                                                            |
| Crystal system                             | orthorhombic                                                      |
| Space group (number)                       | <i>Pcca</i> (54)                                                  |
| <i>a</i> [Å]                               | 14.5103(10)                                                       |
| <i>b</i> [Å]                               | 14.0161(9)                                                        |
| <i>c</i> [Å]                               | 15.4240(10)                                                       |
| $\alpha$ [°]                               | 90                                                                |
| $\beta$ [°]                                | 90                                                                |
| $\gamma$ [°]                               | 90                                                                |
| Volume [Å <sup>3</sup> ]                   | 3136.9(4)                                                         |
| <i>Z</i>                                   | 8                                                                 |
| $\rho_{\text{calc}}$ [gcm <sup>-3</sup> ]  | 1.583                                                             |
| $\mu$ [mm <sup>-1</sup> ]                  | 7.689                                                             |
| <i>F</i> (000)                             | 1552                                                              |
| Crystal size [mm <sup>3</sup> ]            | 0.13×0.1×0.08                                                     |
| Crystal colour                             | blue                                                              |
| Crystal shape                              | block                                                             |
| Radiation                                  | GaK $\alpha$ ( $\lambda$ =1.34138 Å)                              |
| 2 $\Theta$ range [°]                       | 9.12 to 116.19 (0.79 Å)                                           |
| Index ranges                               | -18 ≤ <i>h</i> ≤ 18<br>-16 ≤ <i>k</i> ≤ 17<br>-19 ≤ <i>l</i> ≤ 19 |
| Reflections collected                      | 34607                                                             |
| Independent reflections                    | 3294<br>$R_{\text{int}} = 0.0861$<br>$R_{\text{sigma}} = 0.0525$  |
| Completeness to<br>$\Theta = 53.594^\circ$ | 98.5 %                                                            |

|                                              |                                   |
|----------------------------------------------|-----------------------------------|
| Data / Restraints / Parameters               | 3294/159/218                      |
| Goodness-of-fit on $F^2$                     | 1.119                             |
| Final $R$ indexes<br>[ $I \geq 2\sigma(I)$ ] | $R_1 = 0.0895$<br>$wR_2 = 0.2169$ |
| Final $R$ indexes<br>[all data]              | $R_1 = 0.0980$<br>$wR_2 = 0.2204$ |
| Largest peak/hole [ $e\text{\AA}^{-3}$ ]     | 1.30/-1.56                        |

**Table S2** Crystal data and structure refinement parameters for SDMOF-1@C<sub>2</sub>H<sub>2</sub>.

| <b>SDMOF-1@C<sub>2</sub>H<sub>2</sub></b> |                                                                               |
|-------------------------------------------|-------------------------------------------------------------------------------|
| Empirical formula                         | C <sub>31</sub> H <sub>33</sub> Cu <sub>2</sub> N <sub>2</sub> O <sub>8</sub> |
| CCDC number                               | 2260961                                                                       |
| Formula weight                            | 688.67                                                                        |
| Temperature [K]                           | 120.00                                                                        |
| Crystal system                            | orthorhombic                                                                  |
| Space group (number)                      | <i>Ibca</i> (73)                                                              |
| $a$ [Å]                                   | 14.429(3)                                                                     |
| $b$ [Å]                                   | 15.544(3)                                                                     |
| $c$ [Å]                                   | 28.110(5)                                                                     |
| $\alpha$ [°]                              | 90                                                                            |
| $\beta$ [°]                               | 90                                                                            |
| $\gamma$ [°]                              | 90                                                                            |
| Volume [Å <sup>3</sup> ]                  | 6305(2)                                                                       |
| $Z$                                       | 8                                                                             |
| $\rho_{\text{calc}}$ [gcm <sup>-3</sup> ] | 1.451                                                                         |
| $\mu$ [mm <sup>-1</sup> ]                 | 7.572                                                                         |
| $F(000)$                                  | 2840                                                                          |
| Crystal size [mm <sup>3</sup> ]           | 0.15×0.12×0.1                                                                 |
| Crystal colour                            | blue                                                                          |
| Crystal shape                             | block                                                                         |
| Radiation                                 | GaK $\alpha$ ( $\lambda=1.34139$ Å)                                           |

|                                                 |                                   |
|-------------------------------------------------|-----------------------------------|
| 2 $\Theta$ range [°]                            | 5.47 to 121.25 (0.77 Å)           |
|                                                 | -13 $\leq$ h $\leq$ 18            |
| Index ranges                                    | -20 $\leq$ k $\leq$ 11            |
|                                                 | -36 $\leq$ l $\leq$ 35            |
| Reflections collected                           | 13404                             |
|                                                 | 3321                              |
| Independent reflections                         | $R_{\text{int}} = 0.0624$         |
|                                                 | $R_{\text{sigma}} = 0.0493$       |
| Completeness to<br>$\Theta = 53.594^\circ$      | 90.7 %                            |
| Data / Restraints / Parameters                  | 3321/1/202                        |
| Goodness-of-fit on $F^2$                        | 1.092                             |
| Final $R$ indexes<br>[ $I \geq 2\sigma(I)$ ]    | $R_1 = 0.0408$<br>$wR_2 = 0.1157$ |
| Final $R$ indexes<br>[all data]                 | $R_1 = 0.0483$<br>$wR_2 = 0.1204$ |
| Largest peak/hole [ $\text{e}\text{\AA}^{-3}$ ] | 0.71/-0.71                        |

**Table S3** The fitted parameters for the dual-site Langmuir-Freundlich equation for the single component isotherms of  $\text{C}_2\text{H}_2$  in SDMOF-1 at 273 K and 298 K.

|                              | 273 K       | 298 K       |
|------------------------------|-------------|-------------|
| $n_{m1}(\text{mmol g}^{-1})$ | 4.666716152 | 0.987630639 |
| $n_{m2}(\text{mmol g}^{-1})$ | 1.05410969  | 3.079531197 |
| $b_1(\text{kPa}^{-1})$       | 9.24118E-10 | 0.042702805 |
| $b_2(\text{kPa}^{-1})$       | 0.303380337 | 0.019085905 |
| $t_1$                        | 0.24030441  | 1.84741693  |
| $t_2$                        | 1.872492361 | 0.217983719 |
| $R^2$                        | 0.9999      | 0.9999      |

**Table S4** The fitted parameters for the dual-site Langmuir-Freundlich equation for the single component isotherms of C<sub>2</sub>H<sub>4</sub> in SDMOF-1 at 273 K and 298 K.

|                                         | 273 K       | 298 K       |
|-----------------------------------------|-------------|-------------|
| n <sub>m1</sub> (mmol g <sup>-1</sup> ) | 1.409535862 | 0.749786007 |
| n <sub>m2</sub> (mmol g <sup>-1</sup> ) | 2.425719243 | 2.219360343 |
| b <sub>1</sub> (kPa <sup>-1</sup> )     | 0.10127739  | 0.000644608 |
| b <sub>2</sub> (kPa <sup>-1</sup> )     | 2.73138E-05 | 1.46561E-05 |
| t <sub>1</sub>                          | 0.065198862 | 7.944606589 |
| t <sub>2</sub>                          | 1.170786369 | 0.780094155 |
| R <sup>2</sup>                          | 0.9999      | 0.9999      |

**Table S5** Summary of the adsorption uptakes, uptake ratio, selectivities and heat of adsorption data for C<sub>2</sub>H<sub>2</sub> and C<sub>2</sub>H<sub>4</sub> in various MOFs.

| MOFs                                      | C <sub>2</sub> H <sub>2</sub><br>uptake at<br>1.0 bar<br>(mmol g <sup>-1</sup> ) | C <sub>2</sub> H <sub>4</sub><br>uptake at<br>1.0 bar<br>(mmol g <sup>-1</sup> ) | C <sub>2</sub> H <sub>2</sub> /C <sub>2</sub> H <sub>4</sub><br>uptake<br>ratio | Selectivity<br>C <sub>2</sub> H <sub>2</sub> /C <sub>2</sub> H <sub>4</sub><br>(1/99) | Q <sub>st</sub><br>(C <sub>2</sub> H <sub>2</sub> ,<br>kJ<br>mol <sup>-1</sup> ) | Ref       |
|-------------------------------------------|----------------------------------------------------------------------------------|----------------------------------------------------------------------------------|---------------------------------------------------------------------------------|---------------------------------------------------------------------------------------|----------------------------------------------------------------------------------|-----------|
| SDMOF-1                                   | 1.7                                                                              | 0.38                                                                             | 4.47                                                                            | 26                                                                                    | 47.5                                                                             | This work |
| UPC-22                                    | 1.67                                                                             | 1.08                                                                             | 1.55                                                                            | 2.7                                                                                   | 21.1                                                                             | 16        |
| BSF-4                                     | 2.38                                                                             | 1.56                                                                             | 1.53                                                                            | 7.3                                                                                   | 35                                                                               | 17        |
| NCU-100a                                  | 4.57                                                                             | 0.32                                                                             | 14.3                                                                            | 7291.3                                                                                | 60.5                                                                             | 18        |
| UTSA-200a                                 | 3.65                                                                             | 0.63                                                                             | 5.79                                                                            | 6320                                                                                  | 40                                                                               | 19        |
| ZU-33                                     | 3.77                                                                             | 0.7                                                                              | 5.39                                                                            | 1100                                                                                  | 43.6                                                                             | 20        |
| M'MOF-3a                                  | 1.9                                                                              | 0.4                                                                              | 4.75                                                                            | 24.03                                                                                 | 25                                                                               | 21        |
| APPT-Cd-<br>ClO <sub>4</sub> <sup>-</sup> | 1.75                                                                             | 0.44                                                                             | 4.01                                                                            | 14.61                                                                                 | 28.6                                                                             | 22        |
| ZU-62-Ni                                  | 3                                                                                | 0.8                                                                              | 3.75                                                                            | 37.2                                                                                  | 43                                                                               | 23        |
| UTSA-100a                                 | 4.27                                                                             | 1.66                                                                             | 2.57                                                                            | 10.72                                                                                 | 22                                                                               | 24        |

|               |      |      |      |        |      |    |
|---------------|------|------|------|--------|------|----|
| ELM-12        | 2.56 | 1    | 2.56 | 14.8   | 25.4 | 25 |
| SIFSIX-1-Cu   | 8.5  | 4.11 | 2.07 | 10.63  | 30   | 26 |
| SIFSIX-2-Cu   | 5.38 | 2.02 | 2.66 | 6.0    | 26.3 | 26 |
| SIFSIX-2-Cu-i | 4    | 2.2  | 1.82 | 44.8   | 52.9 | 26 |
| SIFSIX-3-Ni   | 3.30 | 1.75 | 1.89 | 5.03   | 30.5 | 27 |
| NUM-12a       | 5.37 | 3    | 1.79 | 1.4    | 38.1 | 28 |
| NOTT-300      | 6.34 | 4.28 | 1.48 | 2.17   | 32   | 29 |
| NKMOF-1-Ni    | 2.72 | 2.11 | 1.29 | 1272.6 | 60.3 | 30 |
| CuI-MOF       | 1.25 | 1.03 | 1.22 | 1.4    | 21.4 | 31 |
| ZJU-74a       | 3.8  | 3.21 | 1.18 | 24.2   | 45   | 32 |
| Fe-MOF-74     | 6.8  | 6.1  | 1.11 | 2.08   | 46   | 33 |

**Table S6** Summary of the breakthrough time for five times.

| Cycle time | C <sub>2</sub> H <sub>2</sub> breakthrough time (minutes) |
|------------|-----------------------------------------------------------|
| 1          | 20.69                                                     |
| 2          | 22.41                                                     |
| 3          | 22.41                                                     |
| 4          | 20.69                                                     |
| 5          | 19.83                                                     |

## References

- 1 A. Dawson, D. R. Allan, S. Parsons and M. Ruf, *J. Appl. Crystallogr.*, 2004, **37**, 410-416.
- 2 G. M. Sheldrick, *Acta Crystallogr. Sect. C-Struct. Chem.*, 2015, **71**, 3-8.
- 3 J. Lubben, C. M. Wandtke, C. B. Hubschle, M. Ruf, G. M. Sheldrick and B. Dittrich, *Acta Crystallogr A*, 2019, **75**, 50-62.

- 4 A. L. Myers and J. M. Prausnitz, *AIChE J.*, 1965, **11**, 121-127.
- 5 R. Babarao, Z. Q. Hu, J. W. Jiang, S. Chempath and S. I. Sandler, *Langmuir*, 2007, **23**, 659-666.
- 6 R. Krishna, *RSC Advances*, 2017, **7**, 35724-35737.
- 7 R. Krishna, *Sep. Purif. Technol.*, 2018, **194**, 281-300.
- 8 S. Chowdhury, R. Mishra, P. Saha and P. Kushwaha, *Desalination*, 2011, **265**, 159-168.
- 9 H. Pan, J. A. Ritter and P. B. Balbuena, *Langmuir*, 1998, **14**, 6323-6327.
- 10 T. D. Kühne, M. Iannuzzi, M. Del Ben, V. V. Rybkin, P. Seewald, F. Stein, T. Laino, R. Z. Khaliullin, O. Schütt, F. Schiffmann, D. Golze, J. Wilhelm, S. Chulkov, M. H. Bani-Hashemian, V. Weber, U. Borštnik, M. Taillefumier, A. S. Jakobovits, A. Lazzaro, H. Pabst, T. Müller, R. Schade, M. Guidon, S. Andermatt, N. Holmberg, G. K. Schenter, A. Hehn, A. Bussy, F. Belleflamme, G. Tabacchi, A. Glöß, M. Lass, I. Bethune, C. J. Mundy, C. Plessl, M. Watkins, J. VandeVondele, M. Krack and J. Hutter, *The Journal of Chemical Physics*, 2020, **152**, 194103.
- 11 J. VandeVondele and J. Hutter, *The Journal of Chemical Physics*, 2003, **118**, 4365-4369.
- 12 J. VandeVondele and J. Hutter, *The Journal of Chemical Physics*, 2007, **127**, 114105.
- 13 J. P. Perdew, K. Burke and M. Ernzerhof, *Phys. Rev. Lett.*, 1996, **77**, 3865-3868.
- 14 J. P. Perdew, K. Burke and M. Ernzerhof, *Phys. Rev. Lett.*, 1997, **78**, 1396-1396.
- 15 S. Grimme, J. Antony, S. Ehrlich and H. Krieg, *The Journal of Chemical Physics*, 2010, **132**, 154104.
- 16 X. P. Liu, Y. Li, C. L. Hao, W. D. Fan, W. Liu, J. Q. Liu and Y. J. Wang, *Inorg. Chem. Front.*, 2023, **10**, 824-831.
- 17 Y. B. Zhang, L. Y. Wang, J. B. Hu, S. Duttwyler, X. L. Cui and H. B. Xing, *CrystEngComm*, 2020, **22**, 2649-2655.
- 18 J. Wang, Y. Zhang, P. X. Zhang, J. B. Hu, R. B. Lin, Q. Deng, Z. L. Zeng, H. B. Xing, S. G. Deng and B. L. Chen, *J. Am. Chem. Soc.*, 2020, **142**, 9744-9751.
- 19 B. Li, X. L. Cui, D. O'nolan, H. M. Wen, M. D. Jiang, R. Krishna, H. Wu, R. B. Lin, Y. S. Chen, D. Q. Yuan, H. B. Xing, W. Zhou, Q. L. Ren, G. D. Qian, M. J. Zaworotko and B. L. Chen, *Adv. Mater.*, 2017, **29**, 1704210.
- 20 Q. Wang, J. Hu, L. Yang, Z. Zhang, T. Ke, X. Cui and H. Xing, *Nat. Commun.*, 2022, **13**, 2955.
- 21 S. C. Xiang, Z. J. Zhang, C. G. Zhao, K. L. Hong, X. B. Zhao, D. R. Ding, M. H. Xie, C. D. Wu, M. C. Das, R. Gill, K. M. Thomas and B. L. Chen, *Nat. Commun.*, 2011, **2**, 204.
- 22 G. X. Jin, X. Niu, J. Wang, J. P. Ma, T. L. Hu and Y. B. Dong, *Chem. Mater.*, 2018, **30**, 7433-7437.
- 23 L. F. Yang, A. Y. Jin, L. S. Ge, X. L. Cui and H. B. Xing, *Chem. Commun.*, 2019, **55**, 5001-5004.
- 24 T. L. Hu, H. L. Wang, B. Li, R. Krishna, H. Wu, W. Zhou, Y. F. Zhao, Y. Han, X. Wang, W. D. Zhu, Z. Z. Yao, S. C. Xiang and B. L. Chen, *Nat. Commun.*, 2015,

- 6, 7328.
- 25 L. B. Li, R. B. Lin, R. Krishna, X. Q. Wang, B. Li, H. Wu, J. P. Li, W. Zhou and B. L. Chen, *J. Mater. Chem. A*, 2017, **5**, 18984-18988.
  - 26 X. L. Cui, K. J. Chen, H. B. Xing, Q. W. Yang, R. Krishna, Z. B. Bao, H. Wu, W. Zhou, X. L. Dong, Y. Han, B. Li, Q. L. Ren, M. J. Zaworotko and B. L. Chen, *Science*, 2016, **353**, 141-144.
  - 27 J. Y. Zheng, X. L. Cui, Q. W. Yang, Q. L. Ren, Y. W. Yang and H. B. Xing, *Chem. Eng. J.*, 2018, **354**, 1075-1082.
  - 28 Q. Zhang, S. Q. Yang, L. Zhou, L. Yu, Z. F. Li, Y. J. Zhai and T. L. Hu, *Inorg. Chem.*, 2021, **60**, 19328-19335.
  - 29 S. H. Yang, A. J. Ramirez Cuesta, R. Newby, V. Garcia Sakai, P. Manuel, S. K. Callear, S. I. Campbell, C. C. Tang and M. Schröder, *Nat. Chem.*, 2015, **7**, 121-129.
  - 30 Y. L. Peng, T. Pham, P. Li, T. Wang, Y. Chen, K. J. Chen, K. A. Forrest, B. Space, P. Cheng, M. J. Zaworotko and Z. Zhang, *Angew. Chem. Int. Ed.*, 2018, **57**, 10971-10975.
  - 31 G. X. Jin, J. Wang, J. Y. Liu, J. P. Ma and Y. B. Dong, *Inorg. Chem.*, 2018, **57**, 6218-6221.
  - 32 J. Pei, K. Shao, J. X. Wang, H. M. Wen, Y. Yang, Y. Cui, R. Krishna, B. Li and G. D. Qian, *Adv. Mater.*, 2020, **32**, e1908275.
  - 33 Y. B. He, R. Krishna and B. L. Chen, *Energy Environ. Sci.*, 2012, **5**, 9107.
